# Supplementary material
Source: publisher site journal article supplement (https://www.dovepress.com/article/427507)

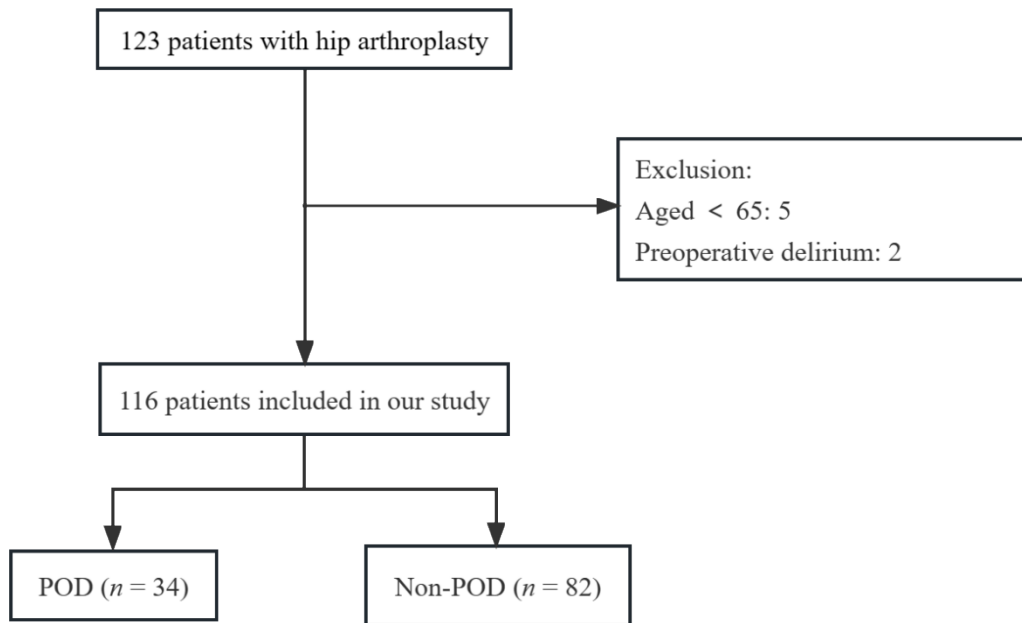

Supplementary Figure 1 Flow chart of participants in the study.

Supplement: Supplementary file 1 [file get_supplementary_file.php]
